# Supplementary material for: Constructing synthetic nuclear architectures via transcriptional condensates in a DNA protonucleus
Source: Research Square preprint supplement (doi:10.21203/rs.3.rs-5959823/v1), 2025-02-07
Supplement: Supplementary file 1 [file 7f409ad6c64a0efa54eb581b.pdf]

# Supplementary Information

## Constructing synthetic nuclear architectures via transcriptional condensates in a DNA protonucleus

Miao Xie<sup>1,2,#</sup>, Weixiang Chen<sup>1,2,#</sup>, Maria de Roy<sup>1</sup>, Andreas Walther<sup>1,2\*</sup>

### Affiliations

<sup>1</sup>Life-Like Materials and Systems, University of Mainz, Duesbergweg 10-14, 55128 Mainz, Germany.

<sup>2</sup>Max Planck Institute for Polymer Research, 55128 Mainz, Germany.

\*Corresponding author. Email: andreas.walther@uni-mainz.de

#These authors contributed equally.

|                                                                                                                                                                                                |    |
|------------------------------------------------------------------------------------------------------------------------------------------------------------------------------------------------|----|
| Supplementary Figure 1. Preparation of PNs containing promoter sequences (p) inside. ....                                                                                                      | 3  |
| Supplementary Figure 2. Formation of transcriptional KL1 condensates in solution at different NTP concentrations. ....                                                                         | 4  |
| Supplementary Figure 3. Formation of single transcriptional KL1 condensates in PNs. ....                                                                                                       | 5  |
| Supplementary Figure 4. Half-bleaching experiment on KL1 condensates in solution and in PNs. ....                                                                                              | 6  |
| Supplementary Figure 5. Design and transcription of KL1-BrA in solution and in PNs. ....                                                                                                       | 7  |
| Supplementary Figure 6. Formation of transcriptional KL1-PN co-condensate deposited at the bottom of host PN. ....                                                                             | 8  |
| Supplementary Figure 7. Dynamic properties of KL1 phase and PN matrix phase in the KL1-PN co-condensate quantified by FRAP. ....                                                               | 9  |
| Supplementary Figure 8. NUPACK simulation showing the absence of specific interaction between A <sub>20</sub> -o ssDNA and KL1 sequence. ....                                                  | 10 |
| Supplementary Figure 9. Formation of KL1-R1 and KL2-R2 condensates in PNs. ....                                                                                                                | 11 |
| Supplementary Figure 10. Preferred partitioning of A <sub>20</sub> -o ssDNA into KL1-R1 condensates and exclusion of A <sub>20</sub> -o/o* dsDNA from both KL1-R1 and KL2-R2 condensates. .... | 12 |
| Supplementary Table 1. Oligomers for PNs and labels, with their names, sequences, purification methods, modifications, and suppliers. ....                                                     | 13 |
| Supplementary Table 2. Oligomers for kissing loop condensate transcription, with their names, sequences, purification methods, modifications, and suppliers. ....                              | 15 |

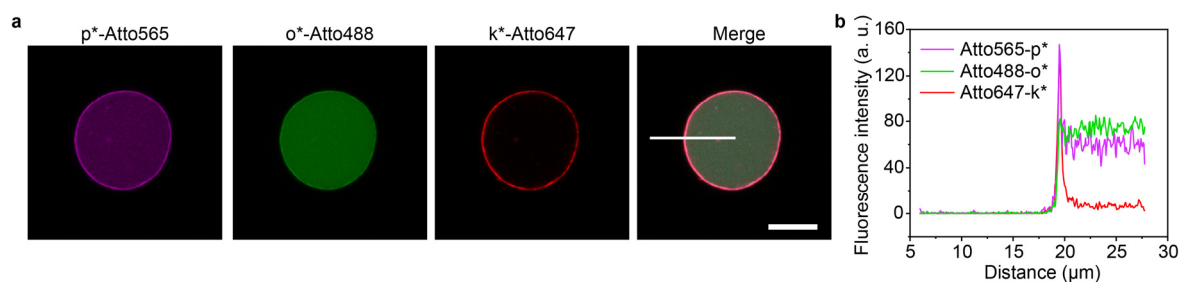

**Supplementary Figure 1. Preparation of PNs containing promoter sequences (p) inside.**

**a**, Representative CLSM images of the PNs containing different core (p and o) and shell (k) barcodes, labeled by their complementary ssDNA strands (k\*-Atto647, p\*-Atto565, and o\*-Atto488). **b**, Fluorescence intensity profiles corresponding to the line segment analysis along the white line in (a) in three channels, showing a core-shell structure with poly(A<sub>20</sub>-p)<sub>n</sub> and poly(A<sub>20</sub>-o)<sub>n</sub> colocalized at the interior of the PN, and poly(T<sub>20</sub>-k)<sub>n</sub> at the PN shell. Scale bar: 10 μm.

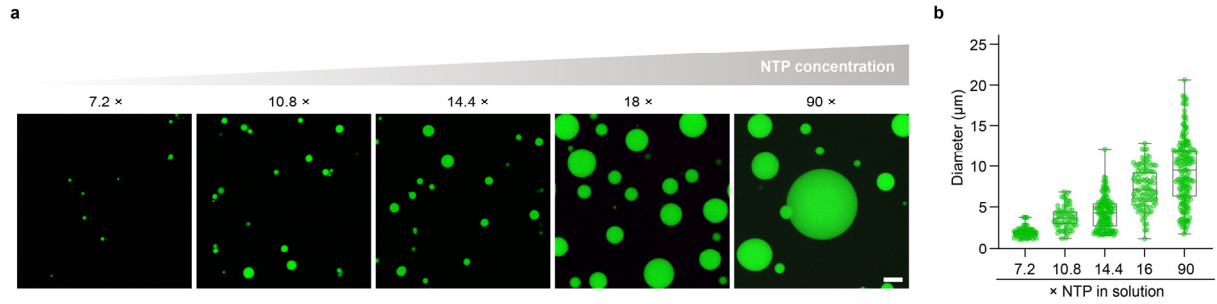

**Supplementary Figure 2. Formation of transcriptional KL1 condensates in solution at different NTP concentrations.**

**a**, Representative CLSM images of in-solution transcriptional KL1 condensates at various  $[NTP] : [T_{KL1}]$  ratios from 7.2 to 90, transcribed by promoter ssDNA ( $[T_{KL1}] : [p] = 1 : 1$ , 30 °C, 30 mM  $Mg^{2+}$ , 2.5 U/μL T7 RNAP). **b**, Diameter distribution at different NTP concentrations. In the box plot (b), the central line marks the median, the box represents the interquartile range (IQR) from Q1 (first quartile) to Q3 (third quartile), and the whiskers enclose all data points from the minimum to the maximum. This applies to all box plots shown in the Supplementary Information. Scale bar: 10 μm.

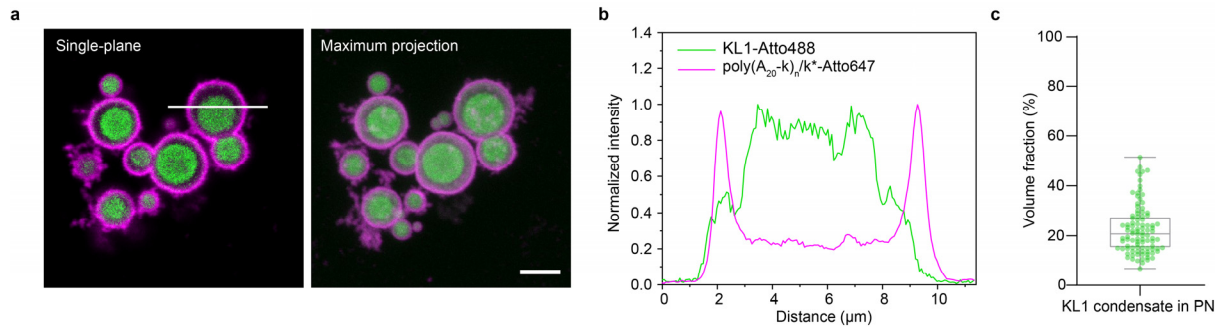

### Supplementary Figure 3. Formation of single transcriptional KL1 condensates in PNs.

**a**, Representative single-plane CLSM image and maximum intensity projection of z-stacked CLSM images showing the formation of single KL1 condensates in each PN ( $[\text{NTP}] : [\text{T}_{\text{KL1}}] = 3.6 : 1$ ,  $30^\circ\text{C}$ ,  $30\text{ mM Mg}^{2+}$ ,  $2.5\text{ U}/\mu\text{L}$  T7 RNAP, 18 h reaction). Green channel: KL1 condensate (labeled by UTP-Atto488); Magenta channel: PN shell (labeled by  $k^*$ -Atto647). Scale bar:  $5\text{ }\mu\text{m}$ . **b**, Normalized intensity profiles corresponding to the line segment analysis along the white line in (a) showing the distribution of KL1 condensates with a spongy structure, and the PN shell. **c**, Volume fraction of single transcriptional KL1 condensate relative to the host PNs. This figure relates to Fig. 2e in the main text.

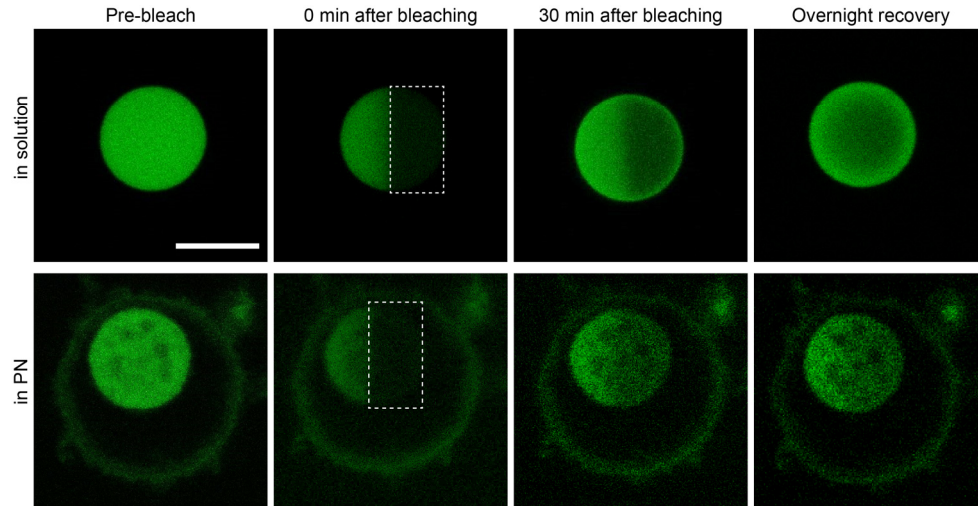

**Supplementary Figure 4. Half-bleaching experiment on KL1 condensates in solution and in PNs.**

Representative CLSM images showing the transcriptional KL1 condensates in solution and in PNs, before and after bleaching at different times. The bleached regions are indicated by the white dashed rectangle. Scale bar: 5  $\mu\text{m}$ .

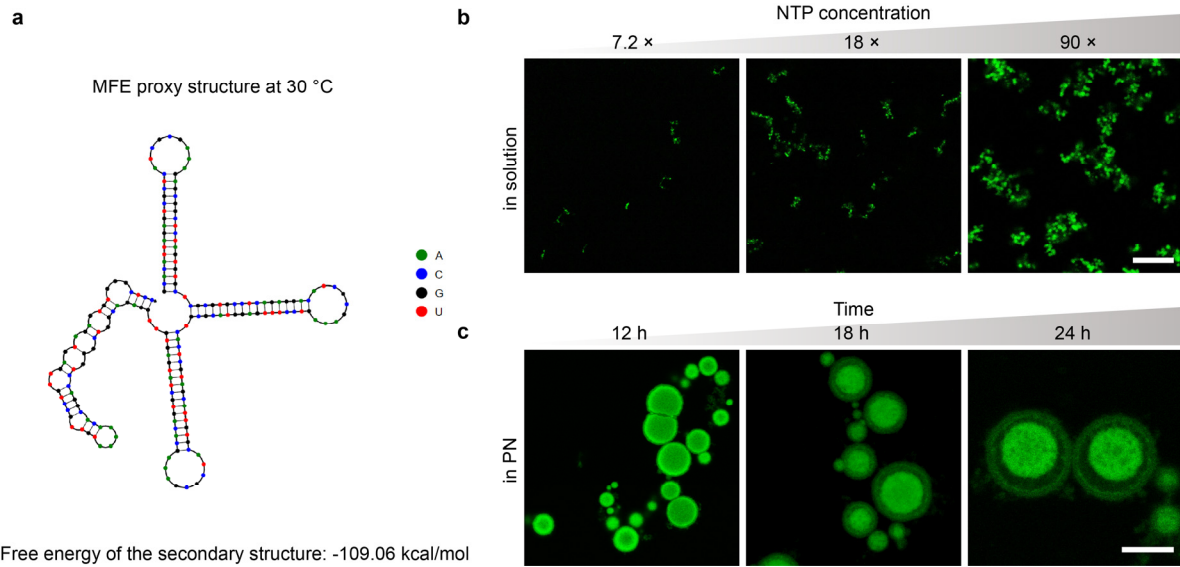

**Supplementary Figure 5. Design and transcription of KL1-BrA in solution and in PNs.**

**a**, NUPACK-simulated structure of KL1-BrA at 30 °C. **b**, Transcription and assembly of KL1-BrA in solution at varying [NTP] : [T<sub>KL1</sub>] ratios from 7.2 to 90 ([T<sub>KL1</sub>] : [p] = 1 : 1, 30 °C, 30 mM Mg<sup>2+</sup>, 24 h reaction). **c**, Formation of transcriptional KL1-BrA condensates in PNs over 12-24 h ([NTP] : [T<sub>KL1</sub>] : [p] = 3.6: 1 : 1, 30 °C, 30 mM Mg<sup>2+</sup>, 2.5 U/μL T7 RNAP). Scale bars: 10 μm.

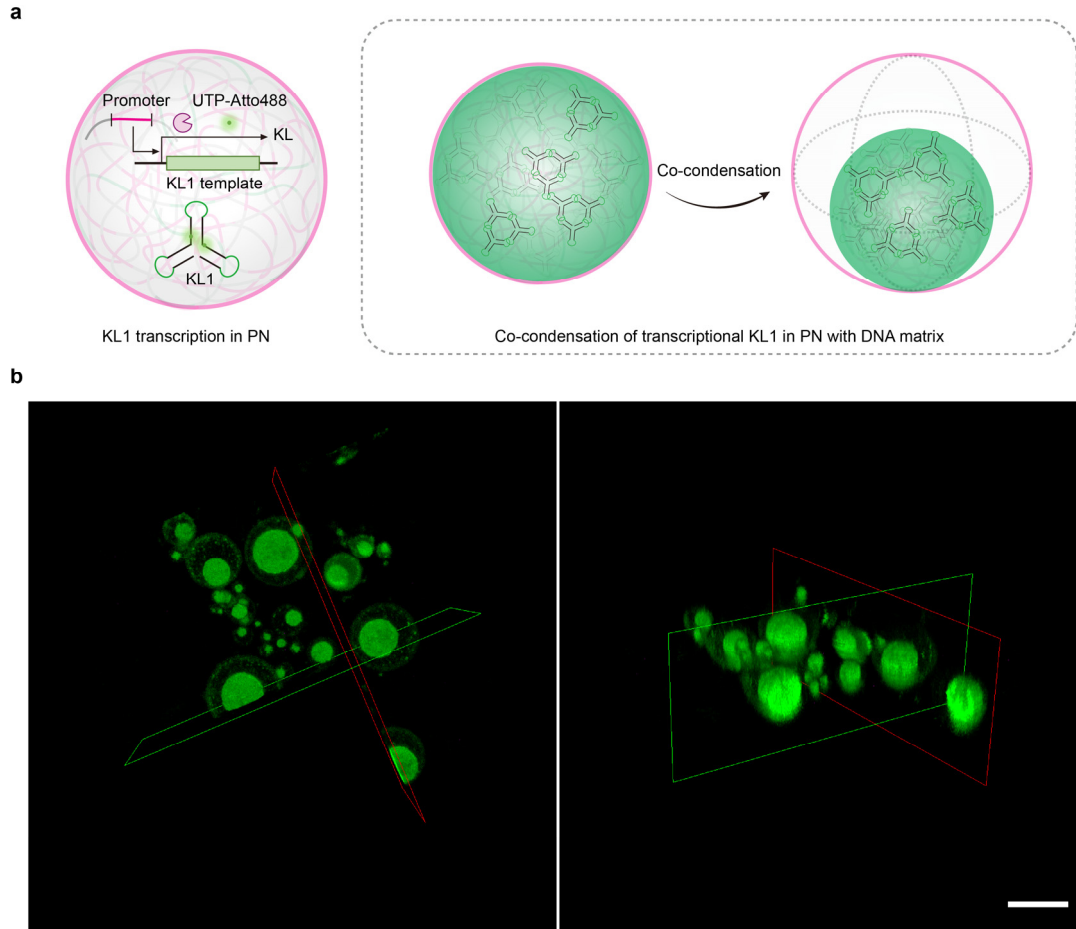

**Supplementary Figure 6. Formation of transcriptional KL1-PN co-condensate deposited at the bottom of host PN.**

**a**, Schematic illustration of KL1-PN co-condensation between KL1 transcripts and DNA matrix of the host PN induced by localized transcription of KL1 in the PN. **b**, Representative 3D CLSM images showing the top (left) and front (right) views of co-condensates in PNs. Scale bar: 10  $\mu\text{m}$ .



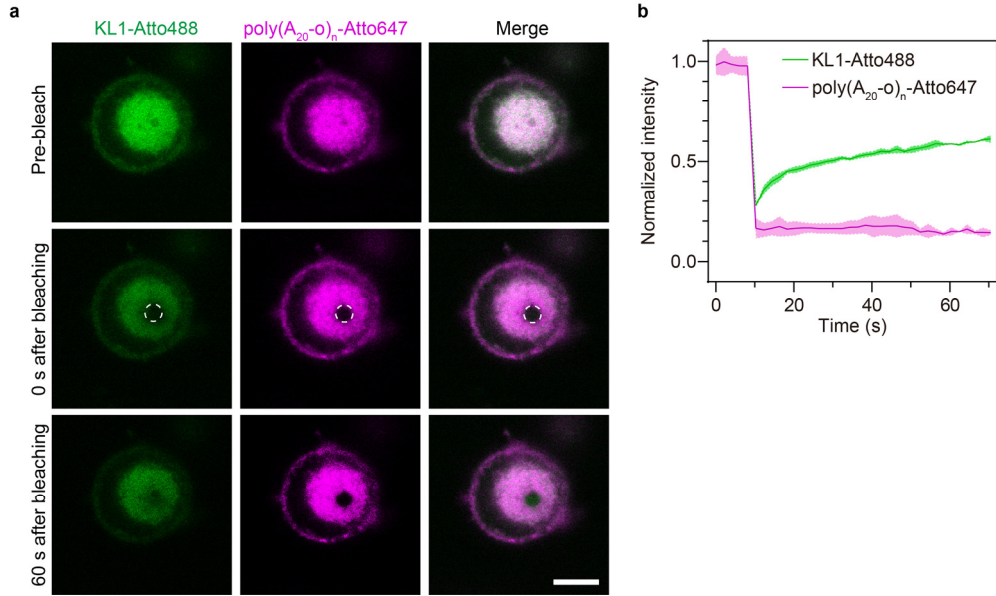

**Supplementary Figure 7. Dynamic properties of KL1 phase and PN matrix phase in the KL1-PN co-condensate quantified by FRAP.**

**a**, Representative CLSM images showing KL1 condensate phase (green channel) and PN matrix phase (magenta channel) of a co-condensate in PNs before and after bleaching at 30 °C. The white dashed circles indicate the bleached regions. **b**, Normalized fluorescence recovery kinetics in the bleached regions in (a) for the KL1 phase and the PN matrix phase, quantifying the molecular diffusivity of co-condensates in PN at 30 °C. Intensity values were normalized to pre-bleached levels.  $n = 3$ . Error areas represent standard deviation. Scale bar: 5  $\mu\text{m}$ .

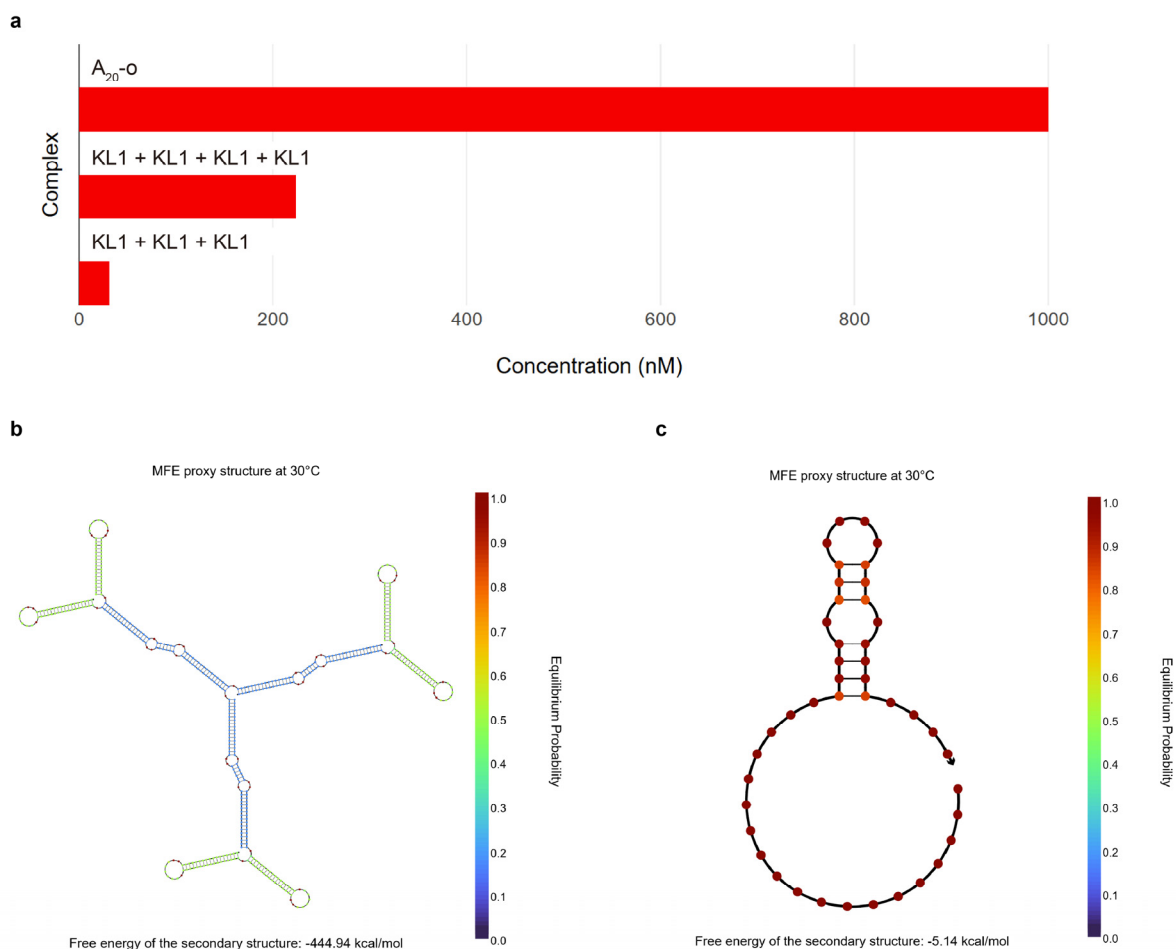

**Supplementary Figure 8. NUPACK simulation showing the absence of specific interaction between A<sub>20</sub>-o ssDNA and KL1 sequence.**

**a**, Simulated complex structures formed by 1  $\mu$ M A<sub>20</sub>-o (ssDNA) and 1  $\mu$ M KL1 (ssDNA) at 30 °C. **b**, NUPACK-simulated structures of KL1+ KL1+ KL1+ KL1. **c**, NUPACK-simulated structures of A<sub>20</sub>-o. No complex structure between A<sub>20</sub>-o and KL1 is formed. Note that all simulations are based on DNA sequences.

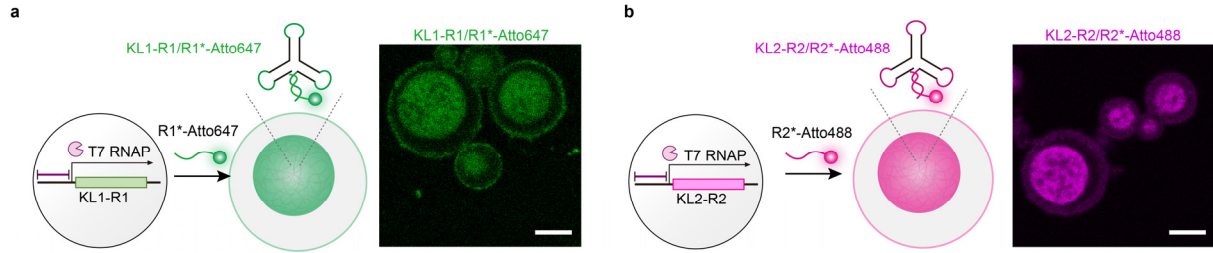

**Supplementary Figure 9. Formation of KL1-R1 and KL2-R2 condensates in PNs.**

**a**, Scheme and representative CLSM image showing the formation of single condensates in PNs by localized transcription of KL1-R1. The condensate is labeled by R1\*-Atto647 (green channel). **b**, Scheme and representative CLSM image showing the formation of single condensates in PNs by localized transcription of KL2-R2. The condensate is labeled by R2\*-Atto488 (magenta channel). 2.5 U/ $\mu$ L T7 RNAP, 30 mM  $Mg^{2+}$ , 30 °C, [NTP] : [R1\* or R2\*] : [ $T_{KL1-R1}$  or  $T_{KL2-R2}$ ] : [p] = 3.6 : 3.6 : 1 : 1, 18 h reaction for both (a) and (b). Scale bars: 5  $\mu$ m.

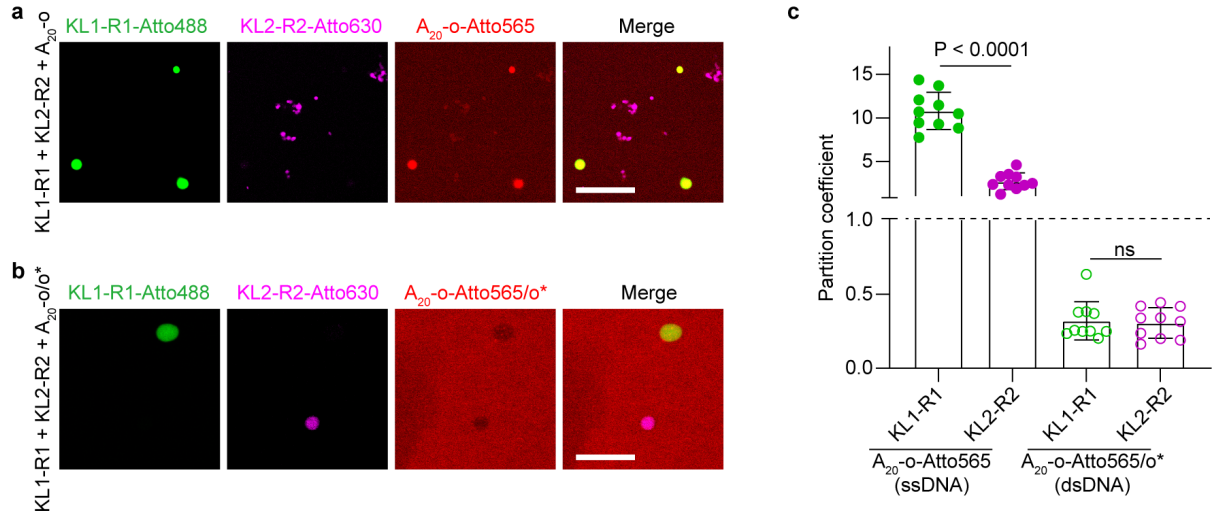

**Supplementary Figure 10. Preferred partitioning of A<sub>20</sub>-o ssDNA into KL1-R1 condensates and exclusion of A<sub>20</sub>-o/o\* dsDNA from both KL1-R1 and KL2-R2 condensates.**

**a**, Representative CLSM images of mixed transcriptional KL1-R1 and KL2-R2 condensates in solution, with the addition of ssDNA A<sub>20</sub>-o-Atto565 for 1 h. **b**, Representative CLSM images of mixed transcriptional KL1-R1 and KL2-R2 condensates in solution with the addition of dsDNA A<sub>20</sub>-o-Atto565/o\* for 1 h. In (a) and (b), both transcriptional condensates were initially prepared in separate reactions and subsequently mixed. ([NTP] : [T<sub>KL1-R1</sub> or T<sub>KL2-R2</sub>] : [p] = 14.4 : 1 : 1, 30 °C, 30 mM Mg<sup>2+</sup>, 18 h reaction). KL1-R1 and KL2-R2 transcripts are labeled with 1 mol% UTP-Atto488 or UTP-Atto630, respectively. Green channel: KL1-R1 condensate; Magenta channel: KL2-R2 condensate; Red channel: A<sub>20</sub>-o-Atto565 ssDNA in (a) and A<sub>20</sub>-o-Atto565/o\* dsDNA in (b). **c**, Partition coefficient of ssDNA A<sub>20</sub>-o-Atto565 and dsDNA A<sub>20</sub>-o-Atto565/o\* in different KL condensates, quantified by normalizing their intensity in KL condensates to their intensity in solution. Error bars represent standard deviation. Scale bars: 10 μm.

| Name             | Sequence (5' → 3')                                                                                       | Purification | Modification                   | Supplier |
|------------------|----------------------------------------------------------------------------------------------------------|--------------|--------------------------------|----------|
| Template and RCA | Tp(A <sub>20</sub> -p)<br>/Phosphate/ATA GTG AGT CGT ATT ATT<br>TTT TTT TTT TTT TTT TTT ATC CCT          | HPLC         | 5'-Phosphorylation             | Biomers  |
|                  | Tp(A <sub>20</sub> -o)<br>/Phosphate/TAC CTC AAT GCT TTT TTT<br>TTT TTT TTT TTT TTG GGA GCA ACA A        | HPLC         | 5'-Phosphorylation             | Biomers  |
|                  | Tp(T <sub>20</sub> -k)<br>/Phosphate/ATC CTC TAA AAT CAA AAA<br>AAA AAA AAA AAA AAA GTA AAA CCA<br>CAC G | HPLC         | 5'-Phosphorylation             | Biomers  |
|                  | ligation-p<br>TAA TAC GAC TCA CTA TAG GGA T                                                              | HPLC         | None                           | Biomers  |
|                  | ligation-o<br>GCA TTG AGG TAT TGT TGC TCC CA                                                             | HPLC         | None                           | Biomers  |
|                  | ligation-k<br>TTT TAG AGG ATC GTG TGG TTT T                                                              | HPLC         | None                           | Biomers  |
|                  | primer-p<br>TAA TAC GAC TCA CTA TAG GG*A*T                                                               | Desalting    | Phosphorothioated<br>twice (*) | IDT      |
|                  | primer-o<br>GCA TTG AGG TAT TGT TGC TC C*C*A                                                             | Desalting    | Phosphorothioated<br>twice (*) | IDT      |
|                  | primer-k<br>TTT TAG AGG ATC GTG TGG TT*T*T                                                               | Desalting    | Phosphorothioated<br>twice (*) | IDT      |
| Label            | Atto565-p*<br>/ATTO565/ATC CCT ATA GTG AGT CGT<br>ATTA                                                   | HPLC         | 5'-Atto565                     | Biomers  |
|                  | Atto647-o*<br>/ATTO647N/TGG GAG CAA CAA TAC CTC<br>AAT GC                                                | HPLC         | 5' Atto647N                    | Biomers  |
|                  | Atto488-k*<br>/ATTO488/ AAA ACC ACA CGA TCC TCT<br>AAA A                                                 | HPLC         | 5' Atto488                     | Biomers  |
|                  | Atto647-k*<br>/ATTO647N/ AAA ACC ACA CGA TCC TCT<br>AAA A                                                | HPLC         | 5' Atto647N                    | Biomers  |
|                  | Atto565-<br>A <sub>20</sub> -o<br>/Atto565/ AAA AAA AAA AAA AAA AAA<br>AA GCA TTG AGG TAT TGT TGC TCCCA  | HPLC         | 5' Atto565                     | Biomers  |
|                  | Atto647-<br>A <sub>20</sub> -o<br>/Atto647N/ AAA AAA AAA AAA AAA AAA<br>AA GCA TTG AGG TAT TGT TGC TCCCA | HPLC         | 5' Atto647N                    | Biomers  |

**Supplementary Table 1. Oligomers for PNs and labels, with their names, sequences, purification methods, modifications, and suppliers.**

| Name          | Sequence (5' → 3')                  | Purification                                                                                                                                                                                               | Modification | Supplier  |         |
|---------------|-------------------------------------|------------------------------------------------------------------------------------------------------------------------------------------------------------------------------------------------------------|--------------|-----------|---------|
| Transcription | P (promoter)                        | TAA TAC GAC TCA CTA TAG GGA T                                                                                                                                                                              | HPLC         | None      | Biomers |
|               | Rep                                 | /6-FAM/CTA CAT CCA CAT ACT A                                                                                                                                                                               | HPLC         | 5'-6-FAM  | Biomers |
|               | Rep'                                | GTT AAT TAG TAT GTG GAT GTAG/BMN-Q1/<br>Q1/                                                                                                                                                                | HPLC         | 3'-BMN-Q1 | Biomers |
|               | T <sub>Rep</sub> * for plate reader | GTT AAT TAG TAT GTG GAT GTA GAT CCC<br>TAT AGT GAG TCG TAT TA                                                                                                                                              | HPLC         | None      | Biomers |
|               | T <sub>x</sub> * for CLSM           | TTA GGA TAG ATA TAC GGG TTC ATC CCT<br>ATA GTG AGT CGT ATT A                                                                                                                                               | HPLC         | None      | Biomers |
| Kissing Loop  | T <sub>KL1</sub>                    | CACTCATAGCACTGTGCTTTCGCGATGCA<br>CAATGCTACGAGTGACGCGTACCTCAAAG<br>GACTTTCGCGATGTCCTCTGAGGCACGCG<br>AGCACACTAGAGCCGCTCTTTCGCGATGA<br>GCGACTCTAATGTGCATCCCTATAGTGAG<br>TCGTATTA                              | HPLC         | None      | IDT     |
|               | T <sub>KL1</sub> '                  | GCACATTAGAGTCGCTCATCGCGAAAGAG<br>CGGCTCTAGTGTGCTCGCGTGCCTCAGAG<br>GACATCGCGAAAGTCCTTTGAGGTACGCG<br>TCACTCGTAGCATTGTGCATCGCGAAAGC<br>ACAGTGCTATGAGTG                                                        | HPLC         | None      | IDT     |
|               | T <sub>KL1-R1</sub>                 | TGGGGTCCTTACTCGTTCAGATGCACTCA<br>TAGCACTGTGCTTTCGCGATGCACAATGC<br>TACGAGTGACGCGTACCTCAAAGGACTTT<br>CGCGATGTCCTCTGAGGCACGCGAGCACA<br>CTAGAGCCGCTCTTTCGCGATGAGCGACT<br>CTAATGTGCATCCCTATAGTGAGTCGTAT<br>TA   | HPLC         | None      | IDT     |
|               | T <sub>KL1-R1</sub> '               | GCACATTAGAGTCGCTCATCGCGAAAGAG<br>CGGCTCTAGTGTGCTCGCGTGCCTCAGAG<br>GACATCGCGAAAGTCCTTTGAGGTACGCG<br>TCACTCGTAGCATTGTGCATCGCGAAAGC<br>ACAGTGCTATGAGTGATCTGAACGAGTA<br>AGGACCCCA                              | HPLC         | None      | IDT     |
|               | T <sub>KL2-R2</sub>                 | CTAACGCCTGTAAATAAGCCACCCACTCA<br>TAGCACTGTGCTTGTGCGACTGCACAATGC<br>TACGAGTGACGCGTACCTCAAAGGACTTG<br>TCGACTGTCCTCTGAGGCACGCGAGCACA<br>CTAGAGCCGCTCTTGTGCGACTGAGCGACT<br>CTAATGTGCATCCCTATAGTGAGTCGTAT<br>TA | HPLC         | None      | IDT     |
|               | T <sub>KL2-R2</sub> '               | GCACATTAGAGTCGCTCAGTCGACAAGAG<br>CGGCTCTAGTGTGCTCGCGTGCCTCAGAG                                                                                                                                             | HPLC         | None      | IDT     |

|                        |                                                                                                                                                                                                                                               |      |             |         |
|------------------------|-----------------------------------------------------------------------------------------------------------------------------------------------------------------------------------------------------------------------------------------------|------|-------------|---------|
|                        | GACAGTCGACAAGTCCTTTGAGGTACGCG<br>TCACTCGTAGCATTGTGCAGTCGACAAGC<br>ACAGTGCTATGAGTGGGTGGCTTATTTAC<br>AGGCGTTAG                                                                                                                                  |      |             |         |
| Atto647-<br>R1*        | /ATTO647N/TCC TTA CTCG                                                                                                                                                                                                                        | HPLC | 5'-Atto647N | Biomers |
| Atto488-<br>R2*        | /ATTO488/CGC CTG TAAA                                                                                                                                                                                                                         | HPLC | 5'-Atto488  | Biomers |
| T <sub>KL1-BrA</sub>   | GGAGCCCACTCTACTCAACAGGCAACA<br>TTTTTGTGCCTGGACCCGACCGTCTCCAAC<br>ACTCATAGCACTGTGCTTTCGCGATGCAC<br>AATGCTACGAGTGACGCGTACCTCAAAGG<br>ACTTTCGCGATGTCCTCTGAGGCACGCGA<br>GCACACTAGAGCCGCTCTTTCGCGATGAG<br>CGACTCTAATGTGCATCCCTATAGTGAGT<br>CGTATTA | HPLC | None        | IDT     |
| T <sub>KL1-BrA</sub> ' | GCACATTAGAGTCGCTCATCGCGAAAGAG<br>CGGCTCTAGTGTGCTCGCGTGCCTCAGAG<br>GACATCGCGAAAGTCCTTTGAGGTACGCG<br>TCACTCGTAGCATTGTGCATCGCGAAAGC<br>ACAGTGCTATGAGTGTTGGAGACGGTCGG<br>GTCCAGGCACAAAAATGTTGCCTGTTGAG<br>TAGAGTGTTGGGCTCC                        | HPLC | None        | IDT     |

**Supplementary Table 2. Oligomers for kissing loop condensate transcription, with their names, sequences, purification methods, modifications, and suppliers.** \* Represents a fully complementary sequence; ' denotes a partially complementary sequence with a toehold.
